# Supplementary material for: Root and Root Canal Configuration Characterization Using Microcomputed Tomography: A Systematic Review
Source: MDPI journal article supplement (doi:10.3390/jcm11092287), 2022-04-20
Supplement: s1 [file s1]

**Table S1. Quality of included studies by JBI critical appraisal checklist for included studies.**

| Study Name |                                   | Question |     |     |     |     |     |    |     |     | Overall Scores |
|------------|-----------------------------------|----------|-----|-----|-----|-----|-----|----|-----|-----|----------------|
|            |                                   | 1        | 2   | 3   | 4   | 5   | 6   | 7  | 8   | 9   |                |
| 1          | (Briseño-Marroquín et al., 2015)  | Yes      | Yes | Yes | Yes | Yes | Yes | No | No  | Yes | 7              |
| 2          | (Wolf et al., 2020d)              | Yes      | Yes | Yes | Yes | Yes | Yes | No | No  | Yes | 7              |
| 3          | (Wolf et al., 2020a)              | Yes      | Yes | Yes | Yes | Yes | Yes | No | No  | Yes | 7              |
| 4          | (Mazzi-Chaves et al., 2020)       | Yes      | Yes | Yes | Yes | Yes | Yes | No | Yes | Yes | 8              |
| 5          | (Domark et al., 2013)             | Yes      | Yes | Yes | Yes | Yes | Yes | No | Yes | Yes | 8              |
| 6          | (Ordinola-Zapata et al., 2017a)   | Yes      | Yes | Yes | Yes | Yes | Yes | No | Yes | Yes | 8              |
| 7          | (Kim et al., 2013)                | Yes      | Yes | Yes | Yes | Yes | Yes | No | No  | Yes | 7              |
| 8          | (Marceliano-Alves et al., 2019)   | Yes      | Yes | Yes | Yes | Yes | Yes | No | No  | Yes | 7              |
| 9          | (Leoni et al., 2014)              | Yes      | Yes | Yes | Yes | Yes | Yes | No | Yes | Yes | 8              |
| 10         | (Filpo-Perez et al., 2015)        | Yes      | Yes | Yes | Yes | Yes | Yes | No | Yes | Yes | 8              |
| 11         | (Marceliano-Alves et al., 2016)   | Yes      | Yes | Yes | Yes | Yes | Yes | No | No  | Yes | 7              |
| 12         | (Verma and Love, 2011)            | Yes      | Yes | Yes | Yes | Yes | Yes | No | No  | Yes | 7              |
| 13         | (De Almeida et al., 2013)         | Yes      | Yes | Yes | Yes | Yes | Yes | No | No  | Yes | 7              |
| 14         | (Ordinola-Zapata et al., 2017b)   | Yes      | Yes | Yes | Yes | Yes | Yes | No | Yes | Yes | 8              |
| 15         | (Wolf et al., 2016)               | Yes      | Yes | Yes | Yes | Yes | Yes | No | No  | Yes | 7              |
| 16         | (Wolf et al., 2017b)              | Yes      | Yes | Yes | Yes | Yes | Yes | No | No  | Yes | 7              |
| 17         | (Wolf et al., 2020b)              | Yes      | Yes | Yes | Yes | Yes | Yes | No | No  | Yes | 7              |
| 18         | (Zhang et al., 2018)              | Yes      | Yes | Yes | Yes | Yes | Yes | No | No  | Yes | 7              |
| 19         | (Marceliano-Alves et al., 2018)   | Yes      | Yes | Yes | Yes | Yes | Yes | No | No  | Yes | 7              |
| 20         | (Sierra-Cristancho et al., 2021)  | Yes      | Yes | Yes | Yes | Yes | Yes | No | Yes | Yes | 8              |
| 21         | (Espir et al., 2018)              | Yes      | Yes | Yes | Yes | Yes | Yes | No | Yes | Yes | 8              |
| 22         | (Wolf et al., 2017a)              | Yes      | Yes | Yes | Yes | Yes | Yes | No | No  | Yes | 7              |
| 23         | (Divine et al., 2019)             | Yes      | Yes | Yes | Yes | Yes | Yes | No | Yes | Yes | 8              |
| 24         | (Camargo Dos Santos et al., 2020) | Yes      | Yes | Yes | Yes | Yes | Yes | No | No  | Yes | 7              |
| 25         | (Tomaszewska et al., 2018d)       | Yes      | Yes | Yes | Yes | Yes | Yes | No | Yes | Yes | 8              |
| 26         | (Lima et al., 2020)               | Yes      | Yes | Yes | Yes | Yes | Yes | No | No  | Yes | 7              |
| 27         | (Fu et al., 2022)                 | Yes      | Yes | Yes | Yes | Yes | Yes | No | Yes | Yes | 8              |
| 28         | (Grande et al., 2008)             | Yes      | Yes | Yes | Yes | Yes | Yes | No | Yes | Yes | 8              |
| 29         | (Ordinola-Zapata et al., 2013a)   | Yes      | Yes | Yes | Yes | Yes | Yes | No | Yes | Yes | 8              |
| 30         | (Shen and Gu, 2021)               | Yes      | Yes | Yes | Yes | Yes | Yes | No | Yes | Yes | 8              |
| 31         | (Dou et al., 2017)                | Yes      | Yes | Yes | Yes | Yes | Yes | No | No  | Yes | 7              |
| 32         | (Alashiry et al., 2020)           | Yes      | Yes | Yes | Yes | Yes | Yes | No | Yes | Yes | 8              |
| 33         | (Qiao et al., 2021)               | Yes      | Yes | Yes | Yes | Yes | Yes | No | Yes | Yes | 8              |
| 34         | (Guillaume et al., 2006)          | Yes      | Yes | Yes | Yes | Yes | Yes | No | No  | Yes | 7              |
| 35         | (Versiani et al., 2012a)          | Yes      | Yes | Yes | Yes | Yes | Yes | No | Yes | Yes | 8              |
| 36         | (Chen et al., 2022)               | Yes      | Yes | Yes | Yes | Yes | Yes | No | Yes | Yes | 8              |
| 37         | (Kyaw Moe et al., 2021)           | Yes      | Yes | Yes | Yes | Yes | Yes | No | No  | Yes | 7              |
| 38         | (Elnour et al., 2016)             | Yes      | Yes | Yes | Yes | Yes | Yes | No | No  | Yes | 7              |
| 39         | (Versiani et al., 2013)           | Yes      | Yes | Yes | Yes | Yes | Yes | No | Yes | Yes | 8              |
| 40         | (Wolf et al., 2021)               | Yes      | Yes | Yes | Yes | Yes | Yes | No | No  | Yes | 7              |
| 41         | (Liu et al., 2013b)               | Yes      | Yes | Yes | Yes | Yes | Yes | No | No  | Yes | 7              |
| 42         | (Rodrigues et al., 2016)          | Yes      | Yes | Yes | Yes | Yes | Yes | No | No  | Yes | 7              |
| 43         | (Wolf et al., 2020c)              | Yes      | Yes | Yes | Yes | Yes | Yes | No | No  | Yes | 7              |
| 44         | (Altan Şallı and Egil, 2021)      | Yes      | Yes | Yes | Yes | Yes | Yes | No | No  | Yes | 7              |
| 45         | (Somma et al., 2009)              | Yes      | Yes | Yes | Yes | Yes | Yes | No | No  | Yes | 7              |
| 46         | (Tomaszewska et al., 2018a)       | Yes      | Yes | Yes | Yes | Yes | Yes | No | Yes | Yes | 8              |
| 47         | (Alkaabi et al., 2017a)           | Yes      | Yes | Yes | Yes | Yes | Yes | No | Yes | Yes | 8              |
| 48         | (Yamada et al., 2011)             | Yes      | Yes | Yes | Yes | Yes | Yes | No | No  | Yes | 7              |

|    |                             |     |     |     |     |     |     |    |     |     |   |
|----|-----------------------------|-----|-----|-----|-----|-----|-----|----|-----|-----|---|
| 49 | (Park et al., 2009)         | Yes | Yes | Yes | Yes | Yes | Yes | No | No  | Yes | 7 |
| 50 | (Tomaszewska et al., 2018c) | Yes | Yes | Yes | Yes | Yes | Yes | No | Yes | Yes | 8 |
| 51 | (Keleş et al., 2020)        | Yes | Yes | Yes | Yes | Yes | Yes | No | Yes | Yes | 8 |

1. Appropriate sampling frame to address the target population, 2. Appropriate sampling way of study participants, 3. Adequate sample size, 4. Detail description of study participants and settings, 5. Data analysis with sufficient coverage of the identified sample, 6. Use of valid methods to identify the condition, 7. Standard, reliable way of measurement of condition for all participants, 8. Availability of appropriate statistical analysis, 9. Adequate response rate and management of low response rate
